# Supplementary material
Source: MDPI journal article supplement (https://www.mdpi.com/2079-8954/11/8/424)
Supplement: s1 [file s1]

Archive with 3 entries (3 files):
- Supplementary materials file S1 (SOS-Pak Questionaire Final).pdf
- Supplementary materials file S2 (final data for logistic regression).csv
- Supplementary materials file S3 (LogPCA Programm).txt
