# Supplementary material
Source: MDPI journal article supplement (https://www.mdpi.com/2079-8954/11/8/424)
Supplement: s1 [file s1 › Supplementary materials file S2 (final data for logistic regression).csv]

QID	Type	IP5	OS1	OS2	OS3	OS5	OS6	OS7	OS8	OS11	OS13	OS14A	OS14B	OS14C	OS14D	OS14E	OS14F	OS14G	BD1	BD2	BD3	BD4	BD6	BD7	BD9	BD11	BD12	BD13	BD14	BD15	BD16	BD17	BD18	BD22	BD24A	BD24B	BD24C	BD24D	BD24E	BD24F	BD24G	BD24H	BD24I	BD24J	BD24K	BD24L	BD24M	BD24N	RC1
1	F	4	1	0	1	1	1	0	1	2									1	1	0.602059991	1	6	0	1	0	0	5	2	5	0	2	0	1	4	4	4	4	3	3	3	3	3	4	4	4	3	NA	0
5	F	2	1	0	1	1	0	0	1	2									1	0	NA	1	NA	NA	NA	0	0	1	0	0	1	1	0	0	5	2	5	5	2	2	2	4	2	5	2	2	2	5	0
6	F	4	1	1	0		0	1	2	1	NA	3	2	4	4	2	4	NA	1	1	3.487421211	2	8	0	0	0	0	1	0	2	0	0	0	0	5	5	5	5	4	3	4	4	4	NA	5	4	4	NA	NA
9	F	2	0	1	1	0	0	0	2	2									1	0	0.301029996	0	7	0	0	0	0	3	3	3	0	0	0	0	5	4	4	3	3	3	3	3	3	2	2	2	3	NA	1
12	F	2	1	1	0	0	1	1	3	1	2	3	3	2	2	2	2	NA	1	1	3.612359948	2	9	1	1	1	1	6	6	3	1	0	0	1	1	1	1	3	2	4	5	4	5	4	5	2	4	NA	0
15	F	4	1	0	0		0	1	2	1	1	5	2	4	4	4	2	NA	1	1	0.477121255	2	9	0	0	0	0	2	1	2	1	4	0	1	5	5	4	4	3	NA	3	3	4	5	4	2	4	NA	0
17	F	1	1	1	0	1	0	NA	3	1	1	4	2	4	4	2	2	NA	NA	NA	NA	NA	NA	NA	NA	NA	NA	NA	NA	NA	NA	NA	NA	NA	NA	NA	NA	NA	NA	NA	NA	NA	NA	NA	NA	NA	NA	NA	1
18	F	2	1	1	0		0	0	1	2									1	0	0	0	7	0	0	0	0	0	0	0	0	0	0	0	5	5	5	5	3	4	2	3	5	4	4	3	3	NA	0
20	F	3	1	1	1	1	1	1	3	2									1	1	3.487421211	2	8	0	1	0	0	3	4	2	1	1	0	0	4	5	2	4	1	1	1	3	3	4	4	3	3	NA	1
21	F	1	1	0	0	0	0	0	2	2									1	0	0	2	8	0	0	0	0	1	0	1	1	1	0	0	4	4	4	4	2	2	2	2	4	4	4	4	4	NA	0
22	F	2	1	1	1	1	0	1	3	2									1	1	0.477121255	1	8	0	1	1	1	3	2	3	1	3	0	0	5	3	4	5	3	2	4	2	3	4	3	4	5	NA	0
23	F	2	1	1	1	1	1	1	2	2									1	0	3.010299957	2	9	0	1	1	1	2	1	1	1	2	0	0	2	5	5	4	4	4	4	5	5	4	5	4	1	NA	1
24	F	3	1	1	0		0	1	3	2									1	1	0.477121255	1	NA	0	0	0	1	5	2	4	1	3	1	0	5	3	4	4	1	3	3	3	2	4	3	2	2	5	1
25	F	4	1	0	0	0	0	0	3	2									1	1	4.487421211	2	3	1	1	1	1	2	1	2	1	3	0	0	4	4	4	4	3	3	3	3	3	4	4	3	3	NA	0
26	F	4	1	1	1	1	1	1	3	1	1	5	1	2	2	2	2	NA	1	1	4.311329952	2	8	1	1	1	1	5	2	5	1	2	1	1	4	4	4	5	5	4	2	3	4	4	4	4	4	NA	1
32	F	1	1	0	1	1	0	0	1	1	1	NA	NA	NA	NA	NA	NA	NA	0	0	3.010299957	1	9	0	0	0	0	1	1	1	1	1	0	0	4	3	4	3	2	2	2	2	2	4	4	4	4	NA	0
33	F	2	0							2									NA	NA	NA	2	6	0	0	0	0	0	0	0	0	0	0	0	NA	NA	NA	NA	NA	NA	NA	NA	NA	NA	NA	NA	NA	NA	0
34	F	2	0							2									NA	0	NA	1	8	0	1	0	0	1	0	0	1	2	0	0	4	NA	3	NA	NA	2	4	NA	NA	NA	NA	NA	NA	NA	0
36	F	4	1	1	0	1	1	1	2	2									0	0	3.311329952	2	9	0	1	0	0	4	1	1	1	4	0	0	4	4	3	4	3	3	4	3	4	4	4	3	3	NA	1
37	F	NA	0							2									1	NA	0.301029996	NA	NA	0	0	NA	NA	NA	NA	NA	NA	NA	NA	NA	NA	NA	NA	NA	NA	NA	NA	NA	NA	NA	NA	NA	NA	NA	0
38	F	NA	1	NA	NA		NA	NA	NA	2									1	1	0.301029996	2	6	0	1	0	0	2	1	2	1	2	1	0	4	4	4	5	3	2	4	3	2	2	2	2	4	NA	0
39	F	1	0							2									1	0	NA	1	8	0	NA	0	0	2	0	1	0	0	0	1	3	4	NA	4	3	2	3	3	3	4	4	3	3	3	0
40	F	2	1	1	1	1	1	1	3	1	2	4	2	3	3	4	4	NA	0	0	0	2	9	0	1	0	0	0	0	1	1	0	0	0	4	4	4	3	3	5	NA	4	3	4	4	3	4	NA	0
44	F	2	1	0	0		0	0	1	2	2	1	2	2	2	2	2	5	1	0	0.301029996	1	3	0	0	0	0	2	0	1	0	1	0	0	1	1	1	1	1	1	1	1	1	1	1	1	1	5	0
45	F	2	1	1	0		0	0	3	2									1	0	0.301029996	2	8	0	0	0	1	3	1	2	1	2	0	0	4	4	4	4	1	1	1	1	1	1	4	1	1	NA	0
51	F	NA	0							2									1	NA	0.301029996	NA	NA	0	0	NA	NA	NA	NA	NA	NA	NA	NA	NA	NA	NA	NA	NA	NA	NA	NA	NA	NA	NA	NA	NA	NA	NA	0
56	F	NA	0							2									1	NA	0.301029996	NA	NA	0	0	NA	NA	NA	NA	NA	NA	NA	NA	NA	NA	NA	NA	NA	NA	NA	NA	NA	NA	NA	NA	NA	NA	NA	0
58	F	NA	0							2									1	NA	0.301029996	NA	NA	0	0	NA	NA	NA	NA	NA	NA	NA	NA	NA	NA	NA	NA	NA	NA	NA	NA	NA	NA	NA	NA	NA	NA	NA	0
62	F	NA	0							2									1	NA	0.301029996	NA	NA	0	0	NA	NA	NA	NA	NA	NA	NA	NA	NA	NA	NA	NA	NA	NA	NA	NA	NA	NA	NA	NA	NA	NA	NA	0
63	F	3	1	1	1	1	1	NA	NA	2									1	0	0	1	NA	0	NA	0	0	1	1	1	1	1	0	0	4	3	3	2	2	2	2	3	4	3	3	2	3	NA	0
64	F	1	1	1	1	1	1	0	2	2									1	0	0.477121255	0	NA	0	NA	0	0	0	0	0	NA	0	0	NA	NA	NA	NA	NA	NA	NA	NA	NA	NA	NA	NA	NA	NA	NA	0
65	F	1	1	1	1	0	1	1	2	2									1	1	3.311329952	0	NA	0	0	0	0	1	1	1	0	1	0	0	4	4	5	5	4	4	2	3	2	4	4	4	3	NA	0
66	F	2	1	1	1	0	0	0	3	1	1	4	1	3	2	3	2	NA	1	0	0	0	6	0	0	NA	0	2	1	2	1	2	0	0	5	4	4	5	3	3	2	4	4	4	4	5	4	NA	1
67	F	3	1	0	1	1	0	1	2	2									1	1	3.487421211	2	9	0	0	1	1	4	2	1	0	0	0	0	4	4	4	3	1	1	2	3	3	3	3	3	3	NA	1
68	F	3	1	1	1	1	1	1	3	1	1	4	2	2	2	2	4	NA	1	1	0.477121255	2	9	0	1	1	1	3	1	3	1	0	0	0	5	4	3	5	3	3	3	4	5	5	5	5	4	NA	0
71	F	2	1	1	1	1	0	0	1	2									1	0	0	2	6	0	1	0	0	2	0	1	1	2	1	0	4	4	4	5	3	3	3	3	3	4	4	4	3	NA	0
72	F	4	0							2									1	1	NA	1	6	0	0	1	1	1	0	1	0	0	0	0	4	4	4	4	4	4	4	4	4	2	2	3	2	NA	0
73	F	2	1	1	1	1	1	0	1	1	NA	NA	NA	NA	NA	NA	NA	NA	NA	NA	NA	NA	NA	NA	NA	NA	NA	NA	NA	NA	NA	NA	NA	NA	NA	NA	NA	NA	NA	NA	NA	NA	NA	NA	NA	NA	NA	NA	1
74	F	3	1	0	1	1	1	1	2	1	1	2	4	4	4	5	3	NA	1	1	3.487421211	1	8	0	0	0	0	3	2	2	1	3	0	NA	5	3	4	1	3	2	4	2	5	5	5	3	2	NA	0
75	F	2	1	1	0		1	1	1	2									1	1	0.477121255	2	6	0	1	0	0	1	2	1	1	2	1	0	3	4	4	5	3	2	4	1	2	4	4	3	2	3	0
76	F	1	1	1	1	1	1	0	1	2									1	0	0	1	6	0	0	0	0	2	1	1	0	0	0	1	4	4	5	2	1	1	1	1	4	3	4	3	3	NA	1
77	F	1	0							2									0	0	0.477121255	1	8	0	0	0	0	4	3	3	1	2	0	0	4	4	5	5	1	3	2	1	5	2	5	4	4	NA	0
79	F	2	1	1	1	1	1	1	3	2									1	0	0.301029996	2	9	0	0	0	0	2	1	2	1	5	1	0	1	1	1	1	3	3	3	1	1	3	2	2	1	NA	1
81	F	2	0							2									1	0	0.301029996	2	8	0	0	0	0	2	1	2	1	3	0	1	4	4	5	4	3	3	4	3	4	4	4	2	3	NA	0
84	F	2	1	1	1	1	0	1	3	2									1	1	NA	1	9	0	0	1	1	3	1	3	1	3	0	0	4	3	2	3	1	1	3	3	3	4	4	4	4	NA	1
87	F	1	1	0	1	0	1	0	1	2									1	1	3.612359948	0	NA	0	1	1	1	2	1	2	1	1	0	0	4	4	5	5	4	5	4	1	3	4	4	3	4	NA	0
91	F	NA	1	1	1	1	0	1	3	2									1	0	0.477121255	2	8	0	0	1	1	3	5	3	1	7	1	1	5	3	1	4	3	4	2	4	3	3	2	1	4	NA	0
92	F	1	1	0	0		1	0	1	1	2	2	2	2	2	2	2	2	1	0	0.301029996	1	3	0	0	0	0	1	1	2	0	0	0	0	4	4	2	5	1	1	1	NA	3	3	4	2	3	NA	0
93	F	2	1	1	1	1	1	1	3	2									1	0	3.311329952	1	9	0	0	0	1	4	2	4	1	2	0	0	2	2	1	2	1	1	2	1	1	1	1	3	4	NA	1
95	P	2	1	1	1	1	1	1	1	2									1	1	3.487421211	2	9	1	1	1	1	4	3	4	1	4	1	1	4	4	4	3	2	2	4	3	4	3	3	3	4	NA	1
96	P	4	1	1	1	1	1	1	NA	2									1	0	3.487421211	2	6	0	0	1	0	2	2	2	1	3	1	0	5	4	4	4	1	2	3	3	4	2	2	4	3	NA	0
98	P	4	1	1	1	1	1	1	2	2									1	1	3.487421211	2	8	0	1	0	0	4	2	4	1	3	1	0	5	5	5	5	3	3	4	5	4	4	4	4	4		1
99	P	2	0							2									NA	NA	NA	NA	NA	NA	NA	NA	NA	NA	NA	NA	NA	NA	NA	NA	NA	NA	NA	NA	NA	NA	NA	NA	NA	NA	NA	NA	NA	NA	0
100	P	2	1	0	0		0	0	NA	1	1	1	1	3	1	1	1	1	1	0	0.477121255	2	7	0	0	0	0	1	1	1	1	3	0	0	5	5	5	5	1	1	4	4	2	5	5	2	4	NA	0
101	P	2	1	0	1	1	0	0	2	2									1	0	0.477121255	2	6	0	0	0	0	3	0	1	1	1	1	0	5	5	5	5	1	1	1	1	5	5	5	2	2	NA	1
103	P	2	0							2									NA	NA	NA	NA	NA	NA	NA	NA	NA	NA	NA	NA	NA	NA	NA	NA	NA	NA	NA	NA	NA	NA	NA	NA	NA	NA	NA	NA	NA	NA	0
104	P	2	1	1	1	1	0	1	1	1	1	3	4	1	2	3	4	3	1	1	3.487421211	2	5	0	1	0	0	1	1	2	1	5	0	0	4	4	5	5	4	3	3	3	3	4	4	5	3	3	0
105	P	4	1	1	1	1	1	1	3	2									1	1	3.487421211	2	9	1	1	0	0	2	1	2	1	1	1	1	NA	NA	NA	NA	NA	NA	NA	NA	NA	NA	NA	NA	NA	NA	1
107	P	3	1	0	0		0	0	1	2									1	0	0.301029996	1	NA	0	0	0	0	2	0	1	0	0	0	1	5	5	5	5	3	3	4	4	4	4	4	3	3	3	0
108	P	2	1	1	0		1	1	2	2									1	1	NA	2	9	1	1	0	0	1	0	2	1	3	1	1	4	4	4	4	2	3	2	3	NA	4	4	2	2	NA	1
110	P	4	1	0	1	0	0	0	1	2									1	0	0	1	6	0	0	0	0	2	1	2	0	1	0	0	5	5	5	4	3	3	3	3	3	3	3	3	3	3	1
112	P	3	1	0	0		0	0	1	1	2	2	2	2	5	4	3	NA	1	0	0	1	9	1	1	1	1	1	1	1	1	1	0	0	4	4	3	NA	1	1	1	1	1	1	3	3	2	NA	0
113	P	4	0							2									1	0	0.301029996	0	NA	0	0	0	0	2	1	2	1	5	0	0	3	3	3	3	3	3	3	3	3	3	3	3	3	3	1
114	P	4	1	1	1	1	1	0	2	2									1	0	3.487421211	2	6	1	1	0	1	2	1	2	1	1	0	1	4	3	4	3	2	3	2	2	2	4	3	2	3	3	1
115	P	2	1	1	1	1	0	0	1	2	NA	NA	NA	NA	NA	NA	NA	NA	1	1	0.301029996	2	6	0	0	0	0	1	0	2	1	3	0	0	NA	NA	NA	NA	NA	NA	NA	NA	NA	NA	NA	NA	NA	NA	0
116	P	NA	0							2									NA	NA	NA	NA	NA	NA	NA	NA	NA	NA	NA	NA	NA	NA	NA	NA	NA	NA	NA	NA	NA	NA	NA	NA	NA	NA	NA	NA	NA	NA	0
117	P	2	1	1	1	1	1	0	1	2									1	1	0	2	6	0	1	0	0	3	1	2	1	2	0	0	3	3	2	3	3	2	3	3	4	3	3	4	4	NA	1
118	P	3	1	0	0		0	0	2	2									0	0	0	1	6	0	0	0	0	1	1	1	1	2	0	0	4	5	5	4	2	2	2	2	2	4	4	4	2	NA	0
119	P	2	1	0	0		1	1	3	2									1	0	NA	NA	NA	NA	NA	NA	NA	NA	NA	NA	1	NA	NA	NA	NA	NA	NA	NA	NA	NA	NA	NA	NA	NA	NA	NA	NA	NA	0
122	P	1	1	1	1	1	1	1	2	2									1	0	0	1	8	0	1	1	1	1	1	1	1	0	0	1	5	3	4	5	3	3	4	4	4	4	4	3	4	NA	1
123	P	4	1	1	1	1	1	1	2	2									1	1	3.487421211	2	8	0	1	0	0	4	2	4	1	3	1	0	5	5	5	5	3	3	4	5	4	4	4	4	4	NA	1
124	P	4	1	1	1	1	1	1	2	2									1	1	3.487421211	2	8	0	1	0	0	1	2	1	1	2	0	0	5	5	5	5	3	3	4	5	4	4	4	4	4	NA	0
127	P	4	1	1	1	1	1	0	1	2									0	0	3.612359948	2	8	0	NA	0	0	2	1	2	0	2	0	1	4	4	4	4	3	3	4	2	4	4	4	2	3	NA	1
128	P	3	1	1	1	1	1	1	1	2									1	0	0	0	NA	0	0	0	0	1	0	1	1	1	0	1	5	5	5	5	1	1	5	1	5	5	5	5	1	NA	0
129	P	2	1	1	1	1	1	1	3	2									1	1	NA	2	7	0	1	0	0	3	2	3	1	4	1	0	5	NA	5	5	NA	NA	NA	NA	NA	5	3	NA	NA	NA	1
130	P	4	1	1	0	NA	0	0	2	2									1	0	0.301029996	2	7	0	0	0	0	1	1	1	1	2	0	0	3	5	5	4	3	3	4	4	4	4	4	3	3	NA	1
132	P	4	1	1	1	1	0	0	1	1	2	4	3	4	4	4	3	NA	1	0	0.301029996	1	6	0	1	0	0	1	3	1	1	2	1	0	2	4	4	5	2	3	3	3	4	4	4	3	5	NA	1
135	P	3	1	1	1	1	1	0	1	1	1	3	1	1	1	1	5	NA	1	0	3.010299957	0	NA	0	0	0	0	1	0	1	1	1	NA	NA	NA	NA	NA	NA	NA	NA	NA	NA	NA	NA	NA	NA	NA	NA	1
136	P	3	1	0	0		0	0	1	1	1	1	2	3	3	1	5	NA	0	0	0	1	6	0	1	0	0	0	0	0	1	1	0	0	5	5	3	5	3	4	5	5	5	4	4	4	3	NA	0
137	P	4	1	0	1	0	1	1	3	1	2	5	1	2	2	4	2	3	1	1	4.612359948	2	9	0	1	1	NA	5	5	2	1	9	0	0	4	4	4	4	3	3	3	3	3	3	3	3	3	NA	0
138	P	3	1	1	1	1	0	0	2	1	2	NA	NA	NA	NA	NA	NA	NA	1	1	3.010299957	1	NA	0	0	0	0	1	0	1	0	0	1	0	NA	NA	NA	NA	NA	NA	NA	NA	NA	NA	NA	NA	NA	NA	NA
139	P	1	0							1	2	1	4	2	2	3	2	NA	1	0	0.301029996	0	6	0	0	0	0	1	0	0	0	0	0	1	4	3	4	4	3	2	3	3	3	3	3	4	4	NA	1
140	P	2	1	1	1	1	0	0	1	1	1	4	4	2	2	4	2	NA	1	0	3.010299957	1	6	0	1	0	0	0	0	0	1	0	0	0	4	2	4	4	2	2	2	2	2	4	4	4	4	NA	0
141	P	3	1	1	1	1	1	1	1	1	1	NA	NA	5	NA	NA	NA	NA	1	0	0.477121255	0	3	0	0	0	0	1	0	1	0	0	0	0	4	NA	NA	NA	NA	NA	NA	NA	NA	NA	NA	NA	NA	NA	1
142	P	2	1	1	0		1	1	2	2									1	0	3.487421211	2	9	1	1	1	0	1	1	2	1	4	0	1	5	4	5	5	1	4	3	5	4	3	4	4	1	NA	0
143	P	3	1	1	1	1	1	1	2	1	1	1	1	3	4	1	4	NA	1	0	3.311329952	2	5	0	1	0	0	4	2	3	1	3	0	1	4	3	3	3	2	4	4	3	4	3	3	3	4	NA	1
144	P	1	1	1	1	1	0	1	1	2									1	1	0.477121255	2	6	0	1	0	0	2	1	2	1	9	0	0	5	4	4	5	2	4	3	3	3	4	4	2	5	NA	0
145	P	4	1	NA	1	1	0	0	1	2									1	0	0.301029996	0	NA	0	0	0	0	2	1	1	0	0	0	0	4	3	3	3	2	2	2	2	4	4	4	3	3	NA	1
146	P	1	1	1	0		0	0	3	2									1	0	3.311329952	2	9	0	1	0	0	1	2	1	1	2	0	0	5	4	4	5	3	3	4	2	4	5	5	2	4	NA	1
147	P	1	1	0	0		0	0	2	2									1	NA	0.477121255	1	8	0	1	0	0	2	0	2	1	4	0	0	4	4	4	3	2	2	3	3	2	5	5	3	3	NA	0
149	P	4	1	1	1	1	1	1	2	2									1	0	0.301029996	2	8	0	0	0	0	1	1	1	1	1	0	NA	4	5	5	NA	2	2	2	2	4	4	4	4	2	NA	1
150	P	4	0							2									1	0	0	1	7	0	0	0	0	1	1	1	0	0	0	0	4	4	4	5	3	3	3	5	4	5	5	2	3	NA	0
152	P	4	1	1	1	1	0	0	1	2									1	0	3.487421211	2	6	0	0	1	1	3	2	3	1	1	1	1	4	4	5	3	3	2	2	2	3	4	4	4	2	NA	0
153	P	1	0							2									1	1	0.477121255	0	NA	0	0	0	0	1	1	1	1	1	0	0	NA	NA	NA	NA	NA	NA	NA	NA	NA	NA	NA	NA	NA	NA	0
154	P	1	1	0	0	0	0	0	1	2									0	1	0	1	6	0	0	0	0	1	1	2	0	2	0	0	3	3	2	3	3	2	3	3	4	3	3	4	4	NA	0
155	P	2	1	0	0		0	0	2	2	2	2	4	NA	4	5	4	4	1	0	0	1	8	0	0	0	0	2	1	1	1	1	0	0	5	4	5	5	2	2	4	2	2	5	5	4	2	NA	0
156	P	3	1	1	1	0	0	NA	3	2									1	1	3.487421211	2	8	1	1	0	0	4	1	2	1	5	0	0	4	3	4	4	2	3	3	3	4	4	4	3	3	NA	0
157	P	2	1	1	1	1	0	1	3	2									1	0	0	1	NA	0	0	0	1	2	1	0	0	0	0	0	4	4	3	5	2	2	3	4	5	4	4	2	3	NA	0
158	P	1	1	0	1	1	1	1	3	2									1	1	3.487421211	1	6	0	0	1	0	2	0	2	1	3	0	0	5	5	5	5	5	5	5	5	5	5	5	5	1	5	0
159	P	4	1	0	1	1	1	1	2	2									1	0	0.477121255	2	9	0	1	1	1	3	1	1	1	4	0	0	2	2	4	2	2	1	2	2	2	2	2	4	4	NA	1
160	P	NA	1	1	1	1	1	NA	3	2									1	1	3.311329952	2	8	0	1	0	0	4	1	3	1	5	0	0	4	4	4	3	3	3	3	2	3	3	4	4	4	NA	1
161	P	4	1	1	1	1	1	0	1	2									1	0	NA	1	NA	0	1	NA	NA	NA	NA	NA	NA	NA	NA	NA	NA	NA	NA	NA	NA	NA	NA	NA	NA	NA	NA	NA	NA	NA	NA
162	P	4	1	1	0		1	0	2	1	2	2	2	4	4	1	1	NA	1	0	0	2	6	0	0	0	0	1	0	1	1	1	0	0	4	4	4	4	3	2	NA	4	2	4	4	4	4	4	1
163	P	4	1	1	1	1	0	1	2	1	1	4	2	2	4	3	4	2	1	0	0.477121255	2	9	0	0	0	0	1	1	1	1	4	0	0	5	5	5	5	4	4	5	4	5	5	5	5	4	5	0
164	P	4	1	1	1	1	0	1	3	2									1	0	3.487421211	1	6	0	0	0	0	2	1	2	0	0	0	0	5	5	5	5	5	5	5	5	5	5	5	5	5	5	0
165	P	4	1	1	1	1	1	1	2	2									1	0	0	1	9	0	NA	0	0	1	0	1	1	0	1	0	4	NA	3	5	2	2	3	NA	3	4	4	NA	3	NA	1
166	P	4	1	1	1	1	0	1	3	2									1	1	4.311329952	1	6	0	1	1	1	4	1	3	1	3	0	0	4	4	4	4	NA	4	4	4	3	4	4	3	4	NA	1
167	P	3	1	1	1	1	1	1	2	2									1	1	0	1	9	0	1	0	0	1	1	1	1	1	0	1	5	5	4	5	3	2	4	4	3	4	4	4	3	NA	1
168	P	4	1	1	1	1	1	1	2	2									1	0	0.301029996	1	8	0	0	0	1	2	0	3	1	1	0	0	NA	NA	NA	NA	NA	NA	NA	NA	NA	NA	NA	NA	NA	NA	1
169	P	4	1	1	1	0	0	0	2	2									1	1	0.301029996	2	8	0	0	0	0	3	1	2	0	0	0	0	3	4	4	3	2	2	3	3	4	4	4	3	3	NA	0
170	P	2	1	1	1	1	0	1	3	1	1	5	1	1	1	3	1	NA	1	0	0.477121255	2	9	0	1	0	0	4	5	3	1	4	1	1	4	4	3	5	3	3	3	4	5	4	4	4	4	NA	1
171	P	3	1	0	1	1	0	1	3	2									1	1	3.487421211	1	6	0	0	1	1	2	1	2	0	0	0	0	2	2	4	4	1	1	2	2	1	1	1	2	2	NA	1
172	P	3	1	1	1	1	1	1	3	1	NA	NA	NA	NA	NA	NA	NA	NA	1	1	0.477121255	2	8	0	1	1	1	1	1	1	1	1	0	0	NA	NA	NA	NA	NA	NA	NA	NA	NA	NA	NA	NA	NA	NA	0
173	P	3	1	0	1	1	0	1	3	1	1	4	2	1	2	3	3	NA	1	1	0.477121255	2	8	0	1	0	1	2	4	3	0	0	0	0	4	4	4	4	2	3	3	5	2	3	5	1	2	NA	1
174	P	3	1	1	1	1	0	1	3	1	1	4	2	2	2	4	2	NA	1	1	0.477121255	2	6	1	1	0	0	2	1	1	1	2	0	0	4	5	5	5	3	3	3	5	4	4	4	2	3	NA	1
175	P	3	1	1	1	1	1	1	2	2									1	1	3.487421211	0	NA	0	0	0	1	3	1	3	1	3	0	0	4	4	4	5	1	1	3	3	1	4	3	3	3	3	0
176	P	4	1	1	1	1	0	1	1	1	1	2	2	4	5	4	3	NA	1	1	0.301029996	2	9	0	1	1	1	6	6	6	1	6	1	0	4	4	4	3	2	3	4	2	4	2	2	2	3	NA	1
177	P	3	1	1	1	1	1	1	3	2									1	1	0.301029996	2	6	0	1	0	0	3	1	3	1	3	0	0	4	5	5	3	2	2	2	3	3	4	4	4	2	NA	1
178	P	4	1	NA	0		1	1	2	2									1	0	3.010299957	1	6	0	0	0	1	4	1	1	1	3	0	0	4	4	5	4	3	3	4	4	4	4	4	4	4	NA	1
179	P	4	1	1	1	1	1	1	2	2									1	1	0.477121255	1	6	0	0	1	0	5	1	3	1	2	0	0	4	4	5	5	3	3	3	3	3	4	4	4	3	NA	1
180	P	4	1	0	0		1	0	2	1	1	4	3	2	4	3	3	NA	1	1	0.477121255	1	6	0	0	1	1	4	1	4	1	8	1	0	4	3	4	3	3	3	4	3	4	3	4	3	3	NA	0
181	P	4	1	1	1	1	1	1	3	2									1	0	0.477121255	1	9	0	0	0	0	2	1	2	1	3	0	0	4	4	5	5	3	3	3	2	3	4	5	4	4	NA	1
182	P	4	0							2									1	1	0.477121255	2	9	0	1	0	0	4	1	4	1	3	0	1	4	3	4	4	3	3	4	4	4	4	4	4	3	NA	1
183	P	4	0							2									1	NA	NA	NA	NA	NA	NA	0	0	2	1	1	1	2	0	0	NA	NA	NA	NA	NA	NA	NA	NA	NA	NA	NA	NA	NA	NA	NA
184	P	4	1	0	1	1	1	1	3	2									1	0	0.477121255	2	5	0	0	0	0	4	1	4	1	1	0	0	5	4	4	3	2	2	3	3	2	4	4	4	2	2	0
185	P	NA	1	1	1	1	0	1	3	1	1	NA	NA	NA	NA	NA	NA	NA	1	1	3.487421211	1	9	0	1	1	0	6	3	6	1	7	0	1	4	4	4	NA	2	3	4	4	4	4	4	3	4	NA	1
186	P	2	1	1	1	1	1	1	2	2									1	0	3.010299957	2	6	0	1	0	0	3	0	2	1	3	0	0	4	4	4	4	3	NA	NA	NA	NA	4	NA	4	3	NA	0
187	P	2	1	0	0		1	1	1	2									1	0	3.010299957	1	6	0	NA	1	1	4	1	4	1	2	0	0	4	3	4	4	1	2	5	4	4	4	3	4	4	NA	0
188	P	2	1	1	1	1	1	0	NA	2									1	0	0.301029996	0	6	0	NA	0	0	1	0	1	1	1	0	0	4	4	4	4	2	2	4	2	2	4	4	5	3	NA	0
189	P	2	1	1	0		0	1	2	1	1	4	1	3	2	3	2	NA	1	0	0	2	7	0	0	0	0	1	1	2	1	2	0	0	1	4	4	1	2	2	3	2	3	4	3	4	3	NA	0
190	P	NA	1	NA	1	NA	1	NA	NA	1	NA	NA	NA	NA	NA	NA	NA	NA	0	0	0	NA	3	0	1	0	0	1	1	1	1	1	0	0	4	3	4	4	2	NA	3	4	3	4	4	4	4	NA	0
192	P	3	1	0	0		1	0	3	2									1	0	0.301029996	1	7	0	0	0	0	2	1	2	1	1	1	0	4	5	5	3	2	4	3	4	3	3	4	5	NA	NA	1
193	P	NA	1	1	1	1	0	0	2	2									1	0	0	0	NA	0	NA	0	0	1	1	1	1	3	0	1	5	5	5	5	3	3	2	4	4	4	4	3	NA	NA	0
194	P	2	1	0	1	1	0	1	3	1	1	5	2	4	3	4	3	NA	1	1	0.301029996	2	8	0	1	1	1	4	3	4	0	4	0	0	4	2	4	2	2	2	2	2	2	2	4	2	2	NA	0
195	P	3	1	0	0		0	1	3	2									1	0	0.477121255	2	7	0	1	0	0	3	0	2	1	2	0	0	4	4	4	3	3	2	3	2	3	4	4	2	3	NA	0
196	P	2	0							2									1	0	0.301029996	0	NA	0	0	0	0	0	0	0	0	0	0	0	5	5	5	5	2	4	4	4	4	4	4	4	4	NA	0
197	P	3	1	1	1	1	1	0	2	1	1	2	4	4	4	4	3	NA	1	0	3.612359948	1	9	0	1	0	0	2	0	2	1	1	0	0	4	4	4	4	2	2	2	3	4	5	5	5	2	NA	0
198	P	3	1	1	0		0	1	3	2									1	1	0.477121255	2	6	0	0	0	0	3	2	2	0	1	0	0	4	4	4	4	2	4	3	3	3	4	4	2	4	NA	0
199	P	2	1	0	1	1	1	1	3	1	1	4	4	5	5	3	3	NA	1	0	0.477121255	1	3	0	1	0	0	1	1	2	1	9	1	1	2	2	3	3	5	2	3	1	5	4	4	2	3	NA	0
200	P	4	1	0	0		0	1	2	2									1	1	0.301029996	2	NA	0	1	0	0	4	1	2	1	3	0	0	5	5	3	5	5	3	3	3	3	3	3	5	3	NA	0
201	P	3	1	0	1	1	0	1	3	2									1	1	3.487421211	0	NA	NA	NA	NA	NA	NA	NA	NA	NA	NA	NA	NA	NA	NA	NA	NA	NA	NA	NA	NA	NA	NA	NA	NA	NA	NA	0
202	P	2	0							2									NA	NA	NA	NA	NA	NA	NA	NA	NA	NA	NA	NA	NA	NA	NA	NA	NA	NA	NA	NA	NA	NA	NA	NA	NA	NA	NA	NA	NA	NA	0
203	P	2	0							2									1	1	NA	1	NA	0	NA	0	0	0	0	1	0	0	0	0	NA	NA	NA	NA	NA	NA	NA	NA	NA	NA	NA	NA	NA	NA	0
204	P	2	1	1	0		0	0	1	1	1	2	1	5	5	NA	1	NA	1	0	0.301029996	2	9	0	1	0	0	2	1	1	1	3	0	0	4	4	4	5	2	2	3	3	4	5	4	4	3	NA	0
205	P	1	1	1	0		0	0	1	1	1	1	4	2	2	5	3	3	0	0	3.487421211	1	9	0	1	1	1	3	2	1	1	2	0	0	3	4	2	5	1	2	2	3	5	4	4	3	3	3	0
206	P	2	1	1	0		0	1	3	1	1	3	2	5	5	2	4	NA	1	0	0.477121255	2	7	0	0	0	0	5	3	4	1	6	0	0	4	4	4	5	5	2	4	4	4	4	4	3	2	NA	0
207	P	NA	0							2									NA	NA	NA	NA	NA	NA	NA	NA	NA	NA	NA	NA	NA	NA	NA	NA	NA	NA	NA	NA	NA	NA	NA	NA	NA	NA	NA	NA	NA	NA	0
208	P	2	0							2									NA	NA	NA	NA	NA	NA	NA	NA	NA	NA	NA	NA	NA	NA	NA	NA	NA	NA	NA	NA	NA	NA	NA	NA	NA	NA	NA	NA	NA	NA	0
209	P	1	1	1	1	1	0	1	2	2									1	0	0.301029996	2	8	0	1	0	0	3	1	2	1	0	0	0	2	2	4	4	3	3	4	2	3	4	4	3	2	NA	0
211	P	3	1	0	1	1	0	0	3	2									1	1	0.477121255	1	6	0	0	1	1	4	0	3	1	4	1	0	4	4	4	4	3	3	3	3	3	4	4	4	3	3	0
212	P	3	1	1	1	1	0	0	1	2									1	1	3.487421211	0	3	0	0	0	0	4	5	5	1	5	0	0	4	4	4	4	2	2	2	2	2	2	2	4	2	NA	1
214	P	NA	1	0	1	0	0	0	2	2									1	1	0.477121255	1	6	0	NA	0	0	4	1	2	0	0	0	0	2	2	3	4	2	2	2	3	2	4	4	2	3	4	1
215	P	2	1	0	0		0	0	1	2									1	1	0	2	6	0	1	0	1	3	6	2	1	5	1	1	4	4	5	5	2	3	4	3	4	4	5	3	3	NA	0
216	P	2	1	1	1	1	0	1	1	1	1	3	2	4	4	2	4	NA	1	0	0.301029996	0	3	0	0	0	0	1	0	1	0	0	1	0	5	5	4	5	5	NA	2	4	5	5	5	2	4	NA	0
217	P	1	1	1	0		0	0	2	2									1	0	3.010299957	1	NA	0	0	NA	NA	0	0	0	0	0	NA	NA	NA	NA	NA	NA	NA	NA	NA	NA	NA	NA	NA	NA	NA	NA	0
219	P	4	0							2									1	0	0	1	7	0	0	0	0	1	1	1	0	0	0	0	4	4	4	5	3	3	3	5	4	5	5	2	3	NA	0
220	P	2	1	0	0		0	0	1	2									1	1	3.487421211	1	NA	0	0	0	0	4	2	4	0	2	0	0	NA	NA	NA	NA	NA	NA	NA	NA	NA	NA	NA	NA	NA	NA	0
221	P	4	1	0	1	1	1	1	3	1	1	5	2	2	2	2	1	1	1	1	3.311329952	2	7	1	1	1	1	3	1	2	1	1	1	1	4	2	3	2	1	4	4	4	2	2	4	3	4	NA	0
222	P	3	1	1	1	1	0	0	1	2									1	0	0.477121255	2	NA	0	1	0	1	2	3	1	1	1	0	1	4	4	5	5	3	1	4	4	4	5	4	4	2	NA	0
223	P	3	0							1	NA	NA	NA	NA	NA	NA	NA	NA	1	1	0.301029996	1	9	0	0	0	0	2	0	2	0	0	0	0	4	4	4	5	3	2	4	2	4	5	5	2	2	NA	0
224	P	1	1	0	1	1	0	0	NA	2	2	4	3	2	4	4	3	NA	1	0	0.477121255	2	6	0	0	0	0	1	5	2	0	0	0	0	4	4	4	4	4	4	4	4	3	3	3	2	4	NA	0
225	P	3	1	1	1	1	1	1	3	2									1	0	0.477121255	1	7	0	1	1	1	3	1	3	1	2	0	0	3	4	2	5	2	2	3	2	4	5	5	2	2	NA	1
226	P	3	1	0	1	1	1	0	2	2									1	1	3.612359948	1	6	0	0	1	1	3	1	0	1	1	0	0	4	4	4	4	2	2	4	2	4	4	4	2	4	NA	0
227	P	4	1	1	0		0	1	2	2									1	1	0.301029996	2	8	0	0	0	0	2	0	2	1	2	0	0	4	4	5	4	3	3	3	3	4	4	3	4	3	NA	1
228	P	3	1	1	1	1	0	1	3	2									1	0	3.487421211	2	8	0	1	1	1	4	2	3	1	4	0	0	4	3	5	5	3	3	4	3	2	2	2	2	3	NA	0
229	P	3	1	0	0		1	1	2	2									1	1	0.477121255	1	8	0	1	0	1	2	1	2	1	4	0	0	NA	NA	NA	NA	NA	NA	NA	NA	NA	NA	NA	NA	NA	NA	NA
230	P	2	1	0	0		1	1	2	2									1	1	0.477121255	1	8	0	1	0	1	4	2	4	1	3	0	0	NA	4	3	5	4	2	2	2	4	4	3	4	2	NA	1
231	P	1	0							1	1	3	2	3	4	4	3	NA	1	0	3.487421211	2	9	0	0	0	0	1	0	0	NA	NA	0	0	4	4	4	4	5	3	4	5	4	4	4	4	3	3	0
232	P	2	1	0	0		0	0	1	1	1	5	2	1	2	3	2	NA	1	1	0.477121255	2	6	0	0	0	0	6	4	4	1	4	0	0	4	3	4	5	2	3	3	4	4	3	3	2	3	3	0
233	P	NA	1	1	1	1	0	0	NA	2									NA	1	NA	1	8	0	1	0	1	2	1	2	1	4	0	0	4	4	3	5	3	2	2	2	5	4	3	4	3	NA	0
234	P	3	1	1	1	1	1	1	2	1	1	4	1	1	1	1	1	NA	1	1	0.477121255	2	8	1	1	1	1	5	1	3	1	1	1	0	NA	NA	NA	NA	NA	NA	NA	NA	NA	NA	NA	NA	NA	NA	1
