# Supplementary material
Source: MDPI journal article supplement (https://www.mdpi.com/2079-8954/11/8/424)
Supplement: s1 [file s1 › Supplementary materials file S3 (LogPCA Programm).txt]

#=================================================================================
#====================[L O G I S T I C   P C A  ]==================================

#LOADING LIBERARIES
library(logisticPCA)
library(ggplot2)

#LOADING DATA SET
A=read.table("C:/Users/Wasim Abbas/Dropbox/wasim1.csv", row.names=NULL)
B=data.matrix(A, rownames.force = NA)
dimnames(B) = list( 
	c(rep("F",49),rep("P",122)),
   	c("OS1","OS2","OS3","OS5","OS6","OS7","OS9","OS10","OS11","OS13","BD1","BD2J","BD2JA","BD3J","BD4","BD5","BD6J","BD7","BD9","BD10J","BD11","BD12","BD13J","BD14J","BD15J","BD16","BD17J","BD18","BD20","BD22","RC1"))
B
# B is a complete Data Matrix with OS, BD and RC Measures
#---------------------------------------------------------
# OSP Capability Measures (OS1,OS2,OS3,OS5,OS6,OS7,OS9,OS10,OS11,OS13,BD1,BD2J,RC1)
C=B[,c(1:12,31)]
#---------------------------------------------------------
# BDP Capability Measures (BD1,BD2J,BD2JA,BD3J,BD4,BD5,BD6J,BD7,BD9,BD10J,BD11,BD12,BD13J,BD14J,BD15J,BD16,BD17J,BD18,BD20,BD22)
D=B[,c(11,13:30)]
#---------------------------------------------------------
#---------------------------------------------------------
# Data Handling (OS1,OS2,OS3,OS5,OS9,BD1,BD2J)
E=B[,c(1,2,3,4,7,11,12)]
#---------------------------------------------------------
# Liasion With Statistical Dept.(OS6,OS10)
F=B[,c(5,8)]
#---------------------------------------------------------
# Data Privacy (OS5,OS7,OS9,OS11,OS13)
G=B[,c(4,6,7,9,10)]
#---------------------------------------------------------
# Data Recording and Storage(BD1,BD2J,BD2JA,BD3)
H=B[,c(11,12,13,14)]
#---------------------------------------------------------
# Big Data Literacy (BD4,BD5,BD6)
I=B[,c(15,16,17)]
#---------------------------------------------------------
# Big Data Working (BD7,BD9,BD10,BD18,BD20,BD22)
J=B[,c(18,19,20,28,29,30)]
#---------------------------------------------------------
# Big Data Proc. Cap (BD11,BD12,BD13,BD14,BD15,BD16,BD17)
K=B[,c(21,22,23,24,25,26,27)]
#---------------------------------------------------------

#==========`` Filtering the Best model for the data``=============================
logsvd_model = logisticSVD(B, k = 2)
logsvd_model
logpca_cv = cv.lpca(B, ks = 2, ms = 1:10)
logpca_model = logisticPCA(B, k = 2, m = which.min(logpca_cv))
logpca_model 
clogpca_model = convexLogisticPCA(B, k = 2, m = which.min(logpca_cv))
clogpca_model 
#=================================================================================
#==========# ESPONENTIAL FAMILY PCA #=============================================
logsvd_model = logisticSVD(B, k = 2)
logsvd_model

plot(logsvd_model, type = "trace")

Measures = rownames(B)
plot(logsvd_model, type = "scores") + geom_point(aes(colour = Measures)) +
ggtitle("Exponential Family PCA") + scale_colour_manual(values = c("blue", "red"))

head(fitted(logsvd_model, type = "response"))
predict(logsvd_model, B, type = "PCs")

#==================================================================================
#===========# LOGISTIC PCA #=======================================================
# For this we want to first decide which m to use with cross validation.
# We are assuming k = 2 and trying different ms from 1 to 10.

logpca_cv = cv.lpca(B, ks = 2, ms = 1:10)
logpca_cv
plot(logpca_cv)

logpca_model = logisticPCA(B, k = 2, m = which.min(logpca_cv))
logpca_model 
plot(logpca_model, type = "trace")

Measures = rownames(B)
plot(logpca_model, type = "scores") + geom_point(aes(colour = Measures)) +
ggtitle("Logistic PCA") + scale_colour_manual(values = c("blue", "red"))

head(fitted(logpca_model, type = "response"))
predict(logpca_model, B, type = "PCs")

#==================================================================================
#===========# CONVEX LOGISTIC PCA #================================================
clogpca_model = convexLogisticPCA(B, k = 2, m = which.min(logpca_cv))
clogpca_model 
plot(clogpca_model, type = "trace")

Measures = rownames(B)
plot(clogpca_model, type = "scores") + geom_point(aes(colour = Measures)) +
ggtitle("Convex Logistic PCA") + scale_colour_manual(values = c("blue", "red"))

head(fitted(clogpca_model, type = "response"))
predict(clogpca_model, B, type = "PCs")

================== E N D =========================================================
